# Supplementary material for: Modeling the activation of the alternative complement pathway and its effects on hemolysis in health and disease
Source: PubMed Central journal article supplement (PMC7531836; doi:10.1371/journal.pcbi.1008139), 2020-10-02
Supplement: pcbi.1008139.s005.pdf [file pcbi.1008139.s005.pdf]

| Description                                                                                                    | Source | Experimental setting | Species                   | Used for parameter estimation | Figure |
|----------------------------------------------------------------------------------------------------------------|--------|----------------------|---------------------------|-------------------------------|--------|
| Fluid-phase inactivation of C3 in presence and absence of FI, FH, FB, FD                                       | [1]    | In vitro             | Human proteins            | No                            | 2A     |
| C3 conversion to C3b by C3bBb                                                                                  | [2]    |                      | Human proteins            | No                            | 2B     |
| Cleavage of C3b by fixed concentrations of FI and FH                                                           | [3]    |                      | Human proteins            | No                            | 2C     |
| Spontaneous C3a formation in serum samples                                                                     | [4]    |                      | Human serum               | No                            | 2D     |
| Spontaneous C3a formation in serum samples                                                                     | [5]    |                      | Human serum               | No                            | 2D     |
| Spontaneous Bb and C3dg formation in serum samples                                                             | [6]    |                      | Human serum               | No                            | 2E,F   |
| Linking terminal pathway activity to hemolysis                                                                 | [7]    |                      | Various                   | No                            | 3      |
| Time course of rabbit erythrocyte lysis                                                                        | [8]    |                      | Rabbit cells, human serum | Yes                           | 4A     |
| Rabbit erythrocyte lysis as a function of FD and C3 titration and of FD titration at two different time points |        |                      |                           |                               | 4C,D   |
| Rabbit erythrocyte lysis at different serum concentrations                                                     | [9]    |                      | Rabbit cells, human serum | Yes                           | 4B     |
| Rabbit erythrocyte lysis as a function of C5, FB, FD titration                                                 | [10]   |                      | Rabbit cells, human serum | No                            | 4E     |
| Bb and C5a production due to rabbit erythrocyte lysis                                                          |        |                      |                           |                               | 4F     |
| Human erythrocyte lysis with inhibition of FH, DAF, CD59                                                       | [11]   |                      | Human                     | Yes                           | 5A     |
| Human erythrocyte lysis with inhibition of FH, DAF, properdin                                                  | [12]   |                      | Human                     | Yes                           | 5A     |
| Human erythrocyte lysis with inhibition of CD59, DAF                                                           | [13]   | Human                | Yes                       | 5A                            |        |
| Human PNH erythrocyte lysis as a function of eculizumab titration                                              | [14]   | Human                | No                        | 6A                            |        |
| Recovery of hemoglobin in patients with PNH on eculizumab treatment                                            | [15]   | In vivo              | Human                     | No                            | 6B     |

## References

1. Pangburn MK, Schreiber RD, Müller-Eberhard HJ. Formation of the initial C3 convertase of the alternative complement pathway. Acquisition of C3b-like activities by spontaneous hydrolysis of the putative thioester in native C3. *J Exp Med*. 1981;154: 856–67.
2. Pangburn MK, Müller-Eberhard HJ. The C3 convertase of the alternative pathway of human complement. Enzymic properties of the bimolecular proteinase. *Biochem J*. 1986;235: 723–30.
3. Pangburn MK, Müller-Eberhard HJ. Kinetic and thermodynamic analysis of the control of C3b by the complement regulatory proteins factors H and I. *Biochemistry*. 1983;22: 178–85.
4. Morad HOJ, Belete SC, Read T, Shaw AM. Time-course analysis of C3a and C5a quantifies the coupling between the upper and terminal Complement pathways in vitro. *J Immunol Methods*. 2015;427: 13–8.
5. Sagar A, Dai W, Minot M, LeCover R, Varner JD. Reduced order modeling and analysis of the human complement system. *PLoS One*. 2017;12: e0187373.
6. Bergseth G, Ludviksen JK, Kirschfink M, Giclas PC, Nilsson B, Mollnes TE. An international serum standard for application in assays to detect human complement activation products. *Mol Immunol*. 2013;56: 232–9.
7. Takeda J, Kozono H, Takata Y, Hong K, Kinoshita T, Sayama K, et al. Number of hits necessary for complement-mediated hemolysis. *Microbiol Immunol*. 1986;30: 461–8.
8. Wu X, Hutson I, Akk AM, Mascharak S, Pham CTN, Hourcade DE, et al. Contribution of Adipose-Derived Factor D/Adipsin to Complement Alternative Pathway Activation: Lessons from Lipodystrophy. *J Immunol*. 2018;200: 2786–2797.
9. Pangburn MK. Cutting edge: localization of the host recognition functions of complement factor H at the carboxyl-terminal: implications for hemolytic uremic syndrome. *J Immunol*. 2002;169: 4702–6.
10. Thanassi JA, Dharaben P, Yang G, Galvan M, Yhao Y, Fabrycki J, et al. Comparison of complement functional assays: Differential sensitivities of hemolysis and Wieslab assays to levels of complement proteins C5, factor B, and factor D. XXVI ICW Kanazawa. 2016. pp. 1035–1226.
11. Ferreira VP, Pangburn MK. Factor H mediated cell surface protection from complement is critical for the survival of PNH erythrocytes. *Blood*. 2007;110: 2190–2.
12. Leshner AM, Zhou L, Kimura Y, Sato S, Gullipalli D, Herbert AP, et al. Combination of factor H mutation and properdin deficiency causes severe C3 glomerulonephritis. *J Am Soc Nephrol*. 2013;24: 53–65.
13. Wilcox LA, Ezzell JL, Bernshaw NJ, Parker CJ. Molecular basis of the enhanced susceptibility of the erythrocytes of paroxysmal nocturnal hemoglobinuria to hemolysis in acidified serum. *Blood*. 1991;78: 820–9.
14. Harder MJ, Kuhn N, Schrezenmeier H, Höchsmann B, von Zabern I, Weinstock C, et al. Incomplete inhibition by eculizumab: mechanistic evidence for residual C5 activity during strong complement activation. *Blood*. 2017;129: 970–980.
15. Choi CW, Jang JH, Kim JS, Jo D-Y, Lee J-H, Kim S-H, et al. Efficacy of eculizumab in paroxysmal nocturnal hemoglobinuria patients with or without aplastic anemia: prospective study of a Korean PNH cohort. *Blood Res*. 2017;52: 207–211.
