# Supplementary material for: Modeling the activation of the alternative complement pathway and its effects on hemolysis in health and disease
Source: PubMed Central journal article supplement (PMC7531836; doi:10.1371/journal.pcbi.1008139), 2020-10-02
Supplement: pcbi.1008139.s006.pdf [file pcbi.1008139.s006.pdf]

| Complement protein                                                                                                | Initial concentration (uM) |
|-------------------------------------------------------------------------------------------------------------------|----------------------------|
| C3                                                                                                                | 5.40                       |
| C5                                                                                                                | 0.37                       |
| C6                                                                                                                | 0.50                       |
| C7                                                                                                                | 0.50                       |
| C8                                                                                                                | 0.36                       |
| C9                                                                                                                | 0.90                       |
| FB                                                                                                                | 2.20                       |
| FD                                                                                                                | 0.083                      |
| FI                                                                                                                | 0.40                       |
| P                                                                                                                 | 0.47                       |
| FH                                                                                                                | 3.20                       |
| CR1                                                                                                               | 0.0083                     |
| DAF                                                                                                               | 0.027                      |
| Vn                                                                                                                | 6.00                       |
| Cn                                                                                                                | 0.42                       |
| CD59                                                                                                              | 0.21                       |
| Surface (concentration of C3b binding sites for a cell concentration of $5 \cdot 10^{12}$ cells L <sup>-1</sup> ) | 12.1                       |
