# Supplementary material for: Modeling the activation of the alternative complement pathway and its effects on hemolysis in health and disease
Source: PubMed Central journal article supplement (PMC7531836; doi:10.1371/journal.pcbi.1008139), 2020-10-02
Supplement: pcbi.1008139.s009.pdf [file pcbi.1008139.s009.pdf]

## Overview

| Reaction no. | Reactions                                           |
|--------------|-----------------------------------------------------|
| 1 – 111      | Biochemical reactions of the AP                     |
| 112 – 129    | Complement protein turnover reactions (production)  |
| 130 – 223    | Complement protein turnover reactions (degradation) |
| 224 – 226    | Eculizumab reactions                                |

## Biochemical reactions of the AP.

| Reaction no. | Reaction                                                                        | Reaction rate                                                                                                                                              | Reaction location |
|--------------|---------------------------------------------------------------------------------|------------------------------------------------------------------------------------------------------------------------------------------------------------|-------------------|
| 1            | $C3 \rightarrow [C3(H_2O) \text{ fluid}]$                                       | $C3 * [k\_p\_C3(H_2O)]$                                                                                                                                    | Fluid phase       |
| 2            | $[C3(H_2O) \text{ fluid}] + B \leftrightarrow [C3(H_2O)B \text{ fluid}]$        | $[k\_p\_C3(H_2O)B] * [C3(H_2O) \text{ fluid}] * B - [k\_m\_C3(H_2O)B] * [C3(H_2O)B \text{ fluid}]$                                                         | Fluid phase       |
| 3            | $[C3(H_2O) \text{ fluid}] + H \leftrightarrow [C3(H_2O)H \text{ fluid}]$        | $[k\_p\_C3bH] * [C3(H_2O) \text{ fluid}] * H - [k\_m\_C3bH] * [C3(H_2O)H \text{ fluid}]$                                                                   | Fluid phase       |
| 4            | $[C3(H_2O) \text{ fluid}] + CR1 \leftrightarrow [C3(H_2O)CR1 \text{ fluid}]$    | $[k\_p\_C3bCR1] * [C3(H_2O) \text{ fluid}] * CR1 - [k\_m\_C3bCR1] * [C3(H_2O)CR1 \text{ fluid}]$                                                           | Fluid phase       |
| 5            | $[C3(H_2O)Bb \text{ fluid}] \rightarrow [C3(H_2O) \text{ fluid}] + Bb$          | $[k\_m\_C3(H_2O)Bb] * [C3(H_2O)Bb \text{ fluid}]$                                                                                                          | Fluid phase       |
| 6            | $[C3(H_2O)BbH \text{ fluid}] \rightarrow H + Bb + [C3(H_2O) \text{ fluid}]$     | $[k\_m\_C3bBbH \text{ decay}] * [C3(H_2O)BbH \text{ fluid}]$                                                                                               | Fluid phase       |
| 7            | $[C3(H_2O)B \text{ fluid}] + D \rightarrow [C3(H_2O)Bb \text{ fluid}] + Ba + D$ | $[k\_D\_cat\_C3(H_2O)B] * D * [C3(H_2O)B \text{ fluid}] / ([K\_D\_m\_C3(H_2O)B] + [C3bB \text{ fluid}] + [C3(H_2O)B \text{ fluid}] + [C3bB \text{ host}])$ | Fluid phase       |
| 8            | $[C3(H_2O)Bb \text{ fluid}] + H \rightarrow [C3(H_2O)BbH \text{ fluid}]$        | $[k\_p\_C3bH] * [C3(H_2O)Bb \text{ fluid}] * H$                                                                                                            | Fluid phase       |
| 9            | $nfC3b + H_2O \rightarrow [C3b \text{ fluid}]$                                  | $k\_p\_fC3b * nfC3b$                                                                                                                                       | Fluid phase       |

|    |                                                   |                                                                                                                                                                        |             |
|----|---------------------------------------------------|------------------------------------------------------------------------------------------------------------------------------------------------------------------------|-------------|
| 10 | nhC3b + H2O -> [C3b fluid]                        | $k_{p\_fC3b} * nhC3b$                                                                                                                                                  | Fluid phase |
| 11 | [C3b fluid] + B <-> [C3bB fluid]                  | $k_{p\_C3bB} * [C3b\ fluid] * B - k_{m\_C3bB} * [C3bB\ fluid]$                                                                                                         | Fluid phase |
| 12 | [C3b fluid] + H <-> [C3bH fluid]                  | $k_{p\_C3bH} * [C3b\ fluid] * H - k_{m\_C3bH} * [C3bH\ fluid]$                                                                                                         | Fluid phase |
| 13 | [C3b fluid] + CR1 <-> [C3bCR1 fluid]              | $k_{p\_C3bCR1} * [C3b\ fluid] * CR1 - k_{m\_C3bCR1} * [C3bCR1\ fluid]$                                                                                                 | Fluid phase |
| 14 | [C3bBb fluid] -> Bb + [C3b fluid]                 | $k_{m\_C3bBb} * [C3bBb\ fluid]$                                                                                                                                        | Fluid phase |
| 15 | [C3bBbH fluid] -> H + Bb + [C3b fluid]            | $[k_{m\_C3bBbH\ decay}] * [C3bBbH\ fluid]$                                                                                                                             | Fluid phase |
| 16 | [C3bBbCR1 fluid] -> CR1 + Bb + [C3b fluid]        | $[k_{m\_C3bBbCR1\ decay}] * [C3bBbCR1\ fluid]$                                                                                                                         | Fluid phase |
| 17 | [C3bB fluid] + D -> [C3bBb fluid] + Ba + D        | $[k_{D\_cat\_C3bB}] * D * [C3bB\ fluid] / ([K_{D\_m\_C3bB}] + [C3bB\ fluid] + [C3(H2O)B\ fluid] + [C3bB\ host])$                                                       | Fluid phase |
| 18 | [C3bBb fluid] + H -> [C3bBbH fluid]               | $[k_{p\_C3bH}] * H * [C3bBb\ fluid]$                                                                                                                                   | Fluid phase |
| 19 | CR1 + [C3bBb fluid] -> [C3bBbCR1 fluid]           | $[k_{p\_C3bCR1}] * CR1 * [C3bBb\ fluid]$                                                                                                                               | Fluid phase |
| 20 | C3 -> C3a + nfC3b                                 | $[k_{C3\_cat\_C3(H2O)Bb}] * [C3] * [C3(H2O)Bb\ fluid] / ([K_{C3\_m\_C3(H2O)Bb}] + [C3])$                                                                               | Fluid phase |
| 21 | C3 + [C3bBb fluid] -> C3a + nfC3b + [C3bBb fluid] | $[k_{C3\_cat\_C3bBb}] * [C3] * [C3bBb\ fluid] / ([K_{C3\_m\_C3bBb}] + [C3])$                                                                                           | Fluid phase |
| 22 | [C3bH fluid] + I -> H + [iC3b fluid] + I          | $[k_{FI\_cat\_C3bH}] * I * [C3bH\ fluid] / ([K_{FI\_m\_C3bH}] + [C3bH\ fluid] + [C3bCR1\ fluid] + [iC3bCR1\ fluid] + [C3bH\ host] + [C3bCR1\ host] + [iC3bCR1\ host])$ | Fluid phase |
| 23 | [iC3b fluid] + CR1 <-> [iC3bCR1 fluid]            | $[k_{p\_iC3bCR1}] * [iC3b\ fluid] * CR1 - [k_{m\_iC3bCR1}] * [iC3bCR1\ fluid]$                                                                                         | Fluid phase |

|    |                                                |                                                                                                                                                                                                                          |                      |
|----|------------------------------------------------|--------------------------------------------------------------------------------------------------------------------------------------------------------------------------------------------------------------------------|----------------------|
| 24 | [C3bCR1 fluid] + I -> CR1 + [iC3b fluid] + I   | $[k\_FI\_cat\_C3bH] * I * [C3bCR1 \text{ fluid}] / ([K\_FI\_m\_C3bH] + [C3bH \text{ fluid}] + [C3bCR1 \text{ fluid}] + [iC3bCR1 \text{ fluid}] + [C3bH \text{ host}] + [C3bCR1 \text{ host}] + [iC3bCR1 \text{ host}])$  | Fluid phase          |
| 25 | [iC3bCR1 fluid] + I -> CR1 + [C3dg fluid] + I  | $[k\_FI\_cat\_C3bH] * I * [iC3bCR1 \text{ fluid}] / ([K\_FI\_m\_C3bH] + [C3bH \text{ fluid}] + [C3bCR1 \text{ fluid}] + [iC3bCR1 \text{ fluid}] + [C3bH \text{ host}] + [C3bCR1 \text{ host}] + [iC3bCR1 \text{ host}])$ | Fluid phase          |
| 26 | [hC5b7 fluid] -> [C5b7 micelle]                | $[k\_p\_C5b7 \text{ micelle}] * [hC5b7 \text{ fluid}]$                                                                                                                                                                   | Fluid phase          |
| 27 | [hC5b7 fluid] + C8 <-> [C5b8 fluid]            | $[k\_p\_C5b8] * [hC5b7 \text{ fluid}] * C8 - [k\_m\_C5b8] * [C5b8 \text{ fluid}]$                                                                                                                                        | Fluid phase          |
| 28 | [hC5b7 fluid] + Cn <-> [Cn5b7 fluid]           | $[k\_p\_Cn5b7] * [hC5b7 \text{ fluid}] * Cn - [k\_m\_Cn5b7] * [Cn5b7 \text{ fluid}]$                                                                                                                                     | Fluid phase          |
| 29 | [hC5b7 fluid] + Vn <-> [Vn5b7 fluid]           | $[k\_p\_Vn5b7] * [hC5b7 \text{ fluid}] * Vn - [k\_m\_Vn5b7] * [Vn5b7 \text{ fluid}]$                                                                                                                                     | Fluid phase          |
| 30 | [Vn5b7 fluid] + C8 <-> [Vn5b8 fluid]           | $[k\_p\_Vn5b8] * [Vn5b7 \text{ fluid}] * C8 - [k\_m\_Vn5b8] * [Vn5b8 \text{ fluid}]$                                                                                                                                     | Fluid phase          |
| 31 | [Vn5b8 fluid] + C9 <-> [Vn5b9_1 fluid]         | $[k\_p\_Vn5b9] * [Vn5b8 \text{ fluid}] * C9 - [k\_m\_Vn5b9] * [Vn5b9\_1 \text{ fluid}]$                                                                                                                                  | Fluid phase          |
| 32 | [Cn5b7 fluid] + C8 <-> [Cn5b8 fluid]           | $[k\_p\_Cn5b8] * [Cn5b7 \text{ fluid}] * C8 - [k\_m\_Cn5b8] * [Cn5b8 \text{ fluid}]$                                                                                                                                     | Fluid phase          |
| 33 | [Cn5b8 fluid] + C9 <-> [Cn5b9_1 fluid]         | $[k\_p\_Cn5b9] * [Cn5b8 \text{ fluid}] * C9 - [k\_m\_Cn5b9] * [Cn5b9\_1 \text{ fluid}]$                                                                                                                                  | Fluid phase          |
| 34 | [C5b8 fluid] + C9 <-> [C5b9_1 fluid]           | $[k\_p\_C5b9] * [C5b8 \text{ fluid}] * C9 - [k\_m\_C5b9] * [C5b9\_1 \text{ fluid}]$                                                                                                                                      | Fluid phase          |
| 35 | [C3bBbH fluid] -> [C3bBb fluid] + H            | $[k\_m\_C3bH] * [C3bBbH \text{ fluid}]$                                                                                                                                                                                  | Fluid phase          |
| 36 | [C3bBbCR1 fluid] -> CR1 + [C3bBb fluid]        | $[k\_m\_C3bCR1] * [C3bBbCR1 \text{ fluid}]$                                                                                                                                                                              | Fluid phase          |
| 37 | [C3b fluid] + [C3bBb host] <-> [C3bBbC3b host] | $k\_p\_C3bBbC3b * [C3b \text{ fluid}] * [C3bBb \text{ host}] - k\_m\_C3bBbC3b * [C3bBbC3b \text{ host}]$                                                                                                                 | Erythrocyte membrane |

|    |                                                           |                                                                                                                       |                      |
|----|-----------------------------------------------------------|-----------------------------------------------------------------------------------------------------------------------|----------------------|
| 38 | [C3bBbC3bCR1 host] -> CR1 + [C3b fluid] + [C3b host] + Bb | [k_m_C3bBbCR1 decay] * [C3bBbC3bCR1 host]                                                                             | Erythrocyte membrane |
| 39 | [C3bBbC3bDAF host] -> DAF + [C3b fluid] + [C3b host] + Bb | [k_m_C3bBbDAF decay] * [C3bBbC3bDAF host]                                                                             | Erythrocyte membrane |
| 40 | [C3bBbC3bH host] -> H + [C3b fluid] + [C3b host] + Bb     | [k_m_C3bBbH decay] * [C3bBbC3bH host]                                                                                 | Erythrocyte membrane |
| 41 | nfC3b + [Surface host] -> [C3b host]                      | [k_p_C3b_surface] * [nfC3b] * [Surface host]                                                                          | Erythrocyte membrane |
| 42 | [C3bBbP host] -> P + [C3b host] + Bb                      | [k_m_C3bBbP] * [C3bBbP host]                                                                                          | Erythrocyte membrane |
| 43 | C3 + [C3bBbP host] -> C3a + nhC3b + [C3bBbP host]         | [k_C3_cat_C3bBbP] * [C3] * [C3bBbP host] / ([K_C3_m_C3bBbP] + [C3])                                                   | Erythrocyte membrane |
| 44 | [C3bBbP host] + nhC3b -> [C3bBbC3bP host]                 | [k_p_C3bBbC3b] * [C3bBbP host] * nhC3b                                                                                | Erythrocyte membrane |
| 45 | [C3bBP host] + D -> [C3bBbP host] + Ba + D                | [k_D_cat_C3bB] * D * [C3bBP host] / ([K_D_m_C3(H2O)B] + [C3bB fluid] + [C3(H2O)B fluid] + [C3bB host] + [C3bBP host]) | Erythrocyte membrane |
| 46 | [C3bBb host] + P -> [C3bBbP host]                         | [k_p_C3bP] * [C3bBb host] * [P]                                                                                       | Erythrocyte membrane |
| 47 | [C3bBbP host] + [C3b fluid] -> [C3bBbC3bP host]           | [k_p_C3bBbC3b] * [C3bBbP host] * [C3b fluid]                                                                          | Erythrocyte membrane |
| 48 | [iC3b host] + P <-> [iC3bP host]                          | [k_p_iC3bP] * [iC3b host] * [P] - [k_m_iC3bP] * [iC3bP host]                                                          | Erythrocyte membrane |
| 49 | [C3bBbC3b host] + P <-> [C3bBbC3bP host]                  | [k_p_C3bP] * [C3bBbC3b host] * P - [k_m_C3bP] * [C3bBbC3bP host]                                                      | Erythrocyte membrane |
| 50 | [C3bBbC3bPC5 host] -> [C3bBbC3bC5 host] + P               | [k_m_C3bP] * [C3bBbC3bPC5 host]                                                                                       | Erythrocyte membrane |
| 51 | [C3bBbC3bPC5b host] -> [C3bBbC3bC5b host] + P             | [k_m_C3bP] * [C3bBbC3bPC5b host]                                                                                      | Erythrocyte membrane |

|    |                                                                                                  |                                                                                              |                      |
|----|--------------------------------------------------------------------------------------------------|----------------------------------------------------------------------------------------------|----------------------|
| 52 | [C3bBbC3bPC5bC6 host] -> [C3bBbC3bC5bC6 host] + P                                                | [k_m_C3bP] * [C3bBbC3bPC5bC6 host]                                                           | Erythrocyte membrane |
| 53 | [C3bBbC3bPC5bC6 host] + C7 -> [C3bBbC3bP host] + [hC5b7 fluid]                                   | [k_p_C5b7] * [C3bBbC3bPC5bC6 host] * C7                                                      | Erythrocyte membrane |
| 54 | [C3bBbC3bPC5b host] -> [C3bBbC3bP host] + C5b                                                    | [k_m_C5b] * [C3bBbC3bPC5b host]                                                              | Erythrocyte membrane |
| 55 | [C3bBbC3bP host] + C5 -> C5a + [C3bBbC3bPC5b host]                                               | [k_C5_cat_C3bBbC3b] * [C3bBbC3bP host] * C5 / ([K_C5_m_C3bBbC3b] + C5)                       | Erythrocyte membrane |
| 56 | [C3bBbC3bPC5b host] + C6 <-> [C3bBbC3bPC5bC6 host]                                               | [k_p_C3bBbC3bC5bC6] * [C3bBbC3bPC5b host] * C6 - [k_m_C3bBbC3bC5bC6] * [C3bBbC3bPC5bC6 host] | Erythrocyte membrane |
| 57 | C3 + [C3bBb host] -> C3a + nhC3b + [C3bBb host]                                                  | [k_C3_cat_C3bBb] * [C3] * [C3bBb host] / ([K_C3_m_C3bBb] + [C3])                             | Erythrocyte membrane |
| 58 | nhC3b + [Surface host] -> [C3b host]                                                             | [k_p_hC3b] * [nhC3b] * [Surface host] * 15.6                                                 | Erythrocyte membrane |
| 59 | nhC3b + [C3bBb host] -> [C3bBbC3b host]                                                          | [k_p_C3bBbC3b] * [nhC3b] * [C3bBb host]                                                      | Erythrocyte membrane |
| 60 | [hC5b7 fluid] + [Surface host] + [Surface host] + [Surface host] + [Surface host] -> [C5b7 host] | [k_p_C5b7 surface] * [hC5b7 fluid] * [Surface host] * 1.4                                    | Erythrocyte membrane |
| 61 | [C3b host] + CR1 <-> [C3bCR1 host]                                                               | [k_p_C3bCR1] * [C3b host] * CR1 - [k_m_C3bCR1] * [C3bCR1 host]                               | Erythrocyte membrane |
| 62 | [C3b host] + H <-> [C3bH host]                                                                   | [k_p_C3bH_surf] * [C3b host] * H - [k_m_C3bH] * [C3bH host]                                  | Erythrocyte membrane |
| 63 | [C3b host] + B <-> [C3bB host]                                                                   | [k_p_C3bB] * [C3b host] * B - [k_m_C3bB] * [C3bB host]                                       | Erythrocyte membrane |
| 64 | [C3bBbH host] -> H + Bb + [C3b host]                                                             | [k_m_C3bBbH decay] * [C3bBbH host]                                                           | Erythrocyte membrane |
| 65 | [C3bBb host] -> Bb + [C3b host]                                                                  | [k_m_C3bBb] * [C3bBb host]                                                                   | Erythrocyte membrane |

|    |                                                  |                                                                                                                                                                                                                         |                      |
|----|--------------------------------------------------|-------------------------------------------------------------------------------------------------------------------------------------------------------------------------------------------------------------------------|----------------------|
| 66 | [C3bBbCR1 host] -> CR1 + Bb + [C3b host]         | $[k\_m\_C3bBbCR1 \text{ decay}] * [C3bBbCR1 \text{ host}]$                                                                                                                                                              | Erythrocyte membrane |
| 67 | [C3bBbDAF host] -> DAF + Bb + [C3b host]         | $[k\_m\_C3bBbDAF \text{ decay}] * [C3bBbDAF \text{ host}]$                                                                                                                                                              | Erythrocyte membrane |
| 68 | [C3bBbC3b host] -> Bb + [C3b host] + [C3b fluid] | $[k\_m\_C3bBbC3b] * [C3bBbC3b \text{ host}]$                                                                                                                                                                            | Erythrocyte membrane |
| 69 | [C3bB host] + D -> [C3bBb host] + Ba + D         | $[k\_D\_cat\_C3bB] * D * [C3bB \text{ host}] / ([K\_D\_m\_C3(H2O)B] + [C3bB \text{ fluid}] + [C3(H2O)B \text{ fluid}] + [C3bB \text{ host}] + [C3bBP \text{ host}])$                                                    | Erythrocyte membrane |
| 70 | [C3bBb host] + H -> [C3bBbH host]                | $[k\_p\_C3bH\_surf] * [C3bBb \text{ host}] * H$                                                                                                                                                                         | Erythrocyte membrane |
| 71 | [C3bBb host] + CR1 -> [C3bBbCR1 host]            | $[k\_p\_C3bCR1] * [C3bBb \text{ host}] * CR1$                                                                                                                                                                           | Erythrocyte membrane |
| 72 | [C3bBb host] + DAF -> [C3bBbDAF host]            | $[k\_p\_C3bBbDAF] * [C3bBb \text{ host}] * DAF$                                                                                                                                                                         | Erythrocyte membrane |
| 73 | [C3bCR1 host] + I -> CR1 + [iC3b host] + I       | $[k\_FI\_cat\_C3bH] * I * [C3bCR1 \text{ host}] / ([K\_FI\_m\_C3bH] + [C3bH \text{ fluid}] + [C3bCR1 \text{ fluid}] + [iC3bCR1 \text{ fluid}] + [C3bH \text{ host}] + [C3bCR1 \text{ host}] + [iC3bCR1 \text{ host}])$  | Erythrocyte membrane |
| 74 | [iC3b host] + CR1 <-> [iC3bCR1 host]             | $[k\_p\_iC3bCR1] * [iC3b \text{ host}] * CR1 - [k\_m\_iC3bCR1] * [iC3bCR1 \text{ host}]$                                                                                                                                | Erythrocyte membrane |
| 75 | [C3bH host] + I -> H + [iC3b host] + I           | $[k\_FI\_cat\_C3bH] * I * [C3bH \text{ host}] / ([K\_FI\_m\_C3bH] + [C3bH \text{ fluid}] + [C3bCR1 \text{ fluid}] + [iC3bCR1 \text{ fluid}] + [C3bH \text{ host}] + [C3bCR1 \text{ host}] + [iC3bCR1 \text{ host}])$    | Erythrocyte membrane |
| 76 | [iC3bCR1 host] + I -> CR1 + [C3dg host] + I      | $[k\_FI\_cat\_C3bH] * I * [iC3bCR1 \text{ host}] / ([K\_FI\_m\_C3bH] + [C3bH \text{ fluid}] + [C3bCR1 \text{ fluid}] + [iC3bCR1 \text{ fluid}] + [C3bH \text{ host}] + [C3bCR1 \text{ host}] + [iC3bCR1 \text{ host}])$ | Erythrocyte membrane |
| 77 | [C3bBbC3b host] + CR1 -> [C3bBbC3bCR1 host]      | $[k\_p\_C3bCR1] * [C3bBbC3b \text{ host}] * CR1$                                                                                                                                                                        | Erythrocyte membrane |
| 78 | [C3bBbC3b host] + DAF -> [C3bBbC3bDAF host]      | $[k\_p\_C3bBbDAF] * [C3bBbC3b \text{ host}] * DAF$                                                                                                                                                                      | Erythrocyte membrane |

|    |                                                              |                                                                                            |                      |
|----|--------------------------------------------------------------|--------------------------------------------------------------------------------------------|----------------------|
| 79 | [C3bBbC3b host] + H -> [C3bBbC3bH host]                      | [k_p_C3bH_surf] * [C3bBbC3b host] * H                                                      | Erythrocyte membrane |
| 80 | [C3bBbC3bC5b host] -> C5b + [C3bBbC3b host]                  | [k_m_C5b] * [C3bBbC3bC5b host]                                                             | Erythrocyte membrane |
| 81 | [C3bBbC3bC5bC6 host] + C7 -> [C3bBbC3b host] + [hC5b7 fluid] | [k_p_C5b7] * [C3bBbC3bC5bC6 host] * C7                                                     | Erythrocyte membrane |
| 82 | [C3bBbC3b host] + C5 -> C5a + [C3bBbC3bC5b host]             | [k_C5_cat_C3bBbC3b] * [C3bBbC3b host] * C5 / ([K_C5_m_C3bBbC3b] + C5)                      | Erythrocyte membrane |
| 83 | [C3bBbC3bC5b host] + C6 <-> [C3bBbC3bC5bC6 host]             | [k_p_C3bBbC3bC5bC6] * [C3bBbC3bC5b host] * C6 - [k_m_C3bBbC3bC5bC6] * [C3bBbC3bC5bC6 host] | Erythrocyte membrane |
| 84 | [C5b7 host] + C8 -> [C5b8 host]                              | [k_p_C5b8] * [C5b7 host] * C8                                                              | Erythrocyte membrane |
| 85 | [C5b8 host] + C9 -> [C5b9_1 host]                            | [k_p_C5b9] * [C5b8 host] * C9                                                              | Erythrocyte membrane |
| 86 | [C5b9_1 host] + C9 -> [C5b9_2 host]                          | [k_p_C5b9] * [C5b9_1 host] * C9                                                            | Erythrocyte membrane |
| 87 | [C5b9_2 host] + C9 -> [C5b9_3 host]                          | [k_p_C5b9] * [C5b9_2 host] * C9                                                            | Erythrocyte membrane |
| 88 | [C5b9_3 host] + C9 -> [C5b9_4 host]                          | [k_p_C5b9] * [C5b9_3 host] * C9                                                            | Erythrocyte membrane |
| 89 | [C5b9_4 host] + C9 -> [C5b9_5 host]                          | [k_p_C5b9] * [C5b9_4 host] * C9                                                            | Erythrocyte membrane |
| 90 | [C5b9_5 host] + C9 -> [C5b9_6 host]                          | [k_p_C5b9] * [C5b9_5 host] * C9                                                            | Erythrocyte membrane |
| 91 | [C5b9_6 host] + C9 -> [C5b9_7 host]                          | [k_p_C5b9] * [C5b9_6 host] * C9                                                            | Erythrocyte membrane |
| 92 | [C5b9_7 host] + C9 -> [C5b9_8 host]                          | [k_p_C5b9] * [C5b9_7 host] * C9                                                            | Erythrocyte membrane |

|     |                                             |                                                                            |                      |
|-----|---------------------------------------------|----------------------------------------------------------------------------|----------------------|
| 93  | [C5b9_8 host] + C9 -> [C5b9_9 host]         | [k_p_C5b9] * [C5b9_8 host] * C9                                            | Erythrocyte membrane |
| 94  | [C5b9_9 host] + C9 -> [C5b9_10 host]        | [k_p_C5b9] * [C5b9_9 host] * C9                                            | Erythrocyte membrane |
| 95  | [C5b9_10 host] + C9 -> [C5b9_11 host]       | [k_p_C5b9] * [C5b9_10 host] * C9                                           | Erythrocyte membrane |
| 96  | [C5b9_11 host] + C9 -> [C5b9_12 host]       | [k_p_C5b9] * [C5b9_11 host] * C9                                           | Erythrocyte membrane |
| 97  | [C5b9_12 host] + C9 -> [C5b9_13 host]       | [k_p_C5b9] * [C5b9_12 host] * C9                                           | Erythrocyte membrane |
| 98  | [C5b9_13 host] + C9 -> [C5b9_14 host]       | [k_p_C5b9] * [C5b9_13 host] * C9                                           | Erythrocyte membrane |
| 99  | [C5b9_14 host] + C9 -> [C5b9_15 host]       | [k_p_C5b9] * [C5b9_14 host] * C9                                           | Erythrocyte membrane |
| 100 | [C5b9_15 host] + C9 -> [C5b9_16 host]       | [k_p_C5b9] * [C5b9_15 host] * C9                                           | Erythrocyte membrane |
| 101 | [C5b9_16 host] + C9 -> [C5b9_17 host]       | [k_p_C5b9] * [C5b9_16 host] * C9                                           | Erythrocyte membrane |
| 102 | [C5b9_17 host] + C9 -> [MAC host]           | [k_p_C5b9] * [C5b9_17 host] * C9                                           | Erythrocyte membrane |
| 103 | [C5b9_1 host] + CD59 <-> [CD59C5b9_1 host]  | [k_p_CD59C5b9] * [C5b9_1 host] * CD59 - [k_m_CD59C5b9] * [CD59C5b9_1 host] | Erythrocyte membrane |
| 104 | [C3bBbH host] -> [C3bBb host] + H           | [k_m_C3bH] * [C3bBbH host]                                                 | Erythrocyte membrane |
| 105 | [C3bBbC3bH host] -> [C3bBbC3b host] + H     | [k_m_C3bH] * [C3bBbC3bH host]                                              | Erythrocyte membrane |
| 106 | [C3bBbCR1 host] -> [C3bBb host] + CR1       | [k_m_C3bCR1] * [C3bBbCR1 host]                                             | Erythrocyte membrane |
| 107 | [C3bBbC3bCR1 host] -> [C3bBbC3b host] + CR1 | [k_m_C3bCR1] * [C3bBbC3bCR1 host]                                          | Erythrocyte membrane |



|     |                                                       |                                     |                      |
|-----|-------------------------------------------------------|-------------------------------------|----------------------|
| 108 | [C3bBbDAF host] -> [C3bBb host] + DAF                 | [k_m_C3bBbDAF] * [C3bBbDAF host]    | Erythrocyte membrane |
| 109 | [C3bBbC3bDAF host] -> [C3bBbC3b host] + DAF           | [k_m_C3bBbDAF] * [C3bBbC3bDAF host] | Erythrocyte membrane |
| 110 | [C3bBbP host] -> [C3bBb host] + P                     | [k_m_C3bP] * [C3bBbP host]          | Erythrocyte membrane |
| 111 | [C3bBbC3bP host] -> Bb + [C3b host] + [C3b fluid] + P | [k_m_C3bBbC3bP] * [C3bBbC3bP host]  | Erythrocyte membrane |

## Complement protein turnover reactions.

| Reaction no. | Reaction               | Reaction rate           |
|--------------|------------------------|-------------------------|
| 112          | null -> [Surface host] | k_pr_surface            |
| 113          | [Surface host] -> null | [Surface host] * k_el_S |
| 114          | null -> C3             | k_pr_C3                 |
| 115          | null -> C5             | k_pr_C5                 |
| 116          | null -> C6             | k_pr_C6                 |
| 117          | null -> C7             | k_pr_C7                 |
| 118          | null -> C8             | k_pr_C8                 |
| 119          | null -> C9             | k_pr_C9                 |
| 120          | null -> B              | k_pr_B                  |
| 121          | null -> D              | k_pr_D                  |
| 122          | null -> P              | k_pr_P                  |
| 123          | null -> I              | k_pr_I                  |
| 124          | null -> H              | k_pr_H                  |
| 125          | null -> Vn             | k_pr_Vn                 |
| 126          | null -> Cn             | k_pr_Cn                 |
| 127          | null -> CR1            | k_pr_CR1                |
| 128          | null -> DAF            | k_pr_DAF                |
| 129          | null -> CD59           | k_pr_CD59               |

|     |                            |                             |
|-----|----------------------------|-----------------------------|
| 130 | C3 -> null                 | C3 * k_el_C3                |
| 131 | C5 -> null                 | C5 * k_el_C5                |
| 132 | C6 -> null                 | C6 * k_el_C6                |
| 133 | C7 -> null                 | C7 * k_el_C7                |
| 134 | C8 -> null                 | C8 * k_el_C8                |
| 135 | C9 -> null                 | C9 * k_el_C9                |
| 136 | B -> null                  | B * k_el_B                  |
| 137 | D -> null                  | D * k_el_D                  |
| 138 | P -> null                  | P * k_el_P                  |
| 139 | I -> null                  | I * k_el_I                  |
| 140 | H -> null                  | H * k_el_H                  |
| 141 | Vn -> null                 | Vn * k_el_Vn                |
| 142 | Cn -> null                 | Cn * k_el_Cn                |
| 143 | CR1 -> null                | CR1 * k_el_S                |
| 144 | CD59 -> null               | CD59 * k_el_S               |
| 145 | DAF -> null                | DAF * k_el_S                |
| 146 | [C3(H2O) fluid] -> null    | [C3(H2O) fluid] * k_el_C3   |
| 147 | [C3(H2O)B fluid] -> null   | [C3(H2O)B fluid] * k_el_C3  |
| 148 | [C3(H2O)H fluid] -> null   | [C3(H2O)H fluid] * k_el_C3  |
| 149 | [C3(H2O)CR1 fluid] -> null | [C3(H2O)CR1 fluid] * k_el_S |

|     |                            |                              |
|-----|----------------------------|------------------------------|
| 150 | [C3(H2O)Bb fluid] -> null  | [C3(H2O)Bb fluid] * k_el_C3  |
| 151 | [C3(H2O)BbH fluid] -> null | [C3(H2O)BbH fluid] * k_el_C3 |
| 152 | [C3b fluid] -> null        | [C3b fluid] * k_el_C3        |
| 153 | [C3bB fluid] -> null       | [C3bB fluid] * k_el_C3       |
| 154 | [C3bH fluid] -> null       | [C3bH fluid] * k_el_C3       |
| 155 | [C3bCR1 fluid] -> null     | [C3bCR1 fluid] * k_el_S      |
| 156 | [C3bBb fluid] -> null      | [C3bBb fluid] * k_el_C3      |
| 157 | [C3bBbH fluid] -> null     | [C3bBbH fluid] * k_el_C3     |
| 158 | [C3bBbCR1 fluid] -> null   | [C3bBbCR1 fluid] * k_el_S    |
| 159 | nfC3b -> null              | nfC3b * k_el_C3              |
| 160 | nhC3b -> null              | nhC3b * k_el_C3              |
| 161 | Ba -> null                 | Ba * k_el_Ba                 |
| 162 | Bb -> null                 | Bb * k_el_Bb                 |
| 163 | C3a -> null                | C3a * k_el_C3a               |
| 164 | C5a -> null                | C5a * k_el_C5a               |
| 165 | [hC5b7 fluid] -> null      | [hC5b7 fluid] * k_el_C5      |
| 166 | [iC3b fluid] -> null       | [iC3b fluid] * k_el_iC3b     |
| 167 | [iC3bCR1 fluid] -> null    | [iC3bCR1 fluid] * k_el_S     |
| 168 | [C3dg fluid] -> null       | [C3dg fluid] * k_el_C3dg     |
| 169 | [C5b7 micelle] -> null     | [C5b7 micelle] * k_el_C5     |

|     |                                      |                             |
|-----|--------------------------------------|-----------------------------|
| 170 | [C5b8 fluid] -> null                 | [C5b8 fluid] * k_el_C5      |
| 171 | [CnC5b7 fluid] -> null               | [CnC5b7 fluid] * k_el_C5    |
| 172 | [VnC5b7 fluid] -> null               | [VnC5b7 fluid] * k_el_C5    |
| 173 | [VnC5b8 fluid] -> null               | [VnC5b8 fluid] * k_el_C5    |
| 174 | [VnC5b9_1 fluid] -> null             | [VnC5b9_1 fluid] * k_el_C5  |
| 175 | [CnC5b8 fluid] -> null               | [CnC5b8 fluid] * k_el_C5    |
| 176 | [CnC5b9_1 fluid] -> null             | [CnC5b9_1 fluid] * k_el_C5  |
| 177 | [C5b9_1 fluid] -> null               | [C5b9_1 fluid] * k_el_C5    |
| 178 | [C3bBb host] -> [Surface host]       | [C3bBb host] * k_el_S       |
| 179 | [C3bBbC3b host] -> [Surface host]    | [C3bBbC3b host] * k_el_S    |
| 180 | [C3bBbC3bCR1 host] -> [Surface host] | [C3bBbC3bCR1 host] * k_el_S |
| 181 | [C3b host] -> [Surface host]         | [C3b host] * k_el_S         |
| 182 | [C3bBbC3bDAF host] -> [Surface host] | [C3bBbC3bDAF host] * k_el_S |
| 183 | [C3bBbC3bH host] -> [Surface host]   | [C3bBbC3bH host] * k_el_S   |
| 184 | [C3bBbP host] -> [Surface host]      | [C3bBbP host] * k_el_S      |
| 185 | [C3bBbC3bP host] -> [Surface host]   | [C3bBbC3bP host] * k_el_S   |
| 186 | [C3bBP host] -> [Surface host]       | [C3bBP host] * k_el_S       |
| 187 | [iC3b host] -> [Surface host]        | [iC3b host] * k_el_S        |
| 188 | [iC3bP host] -> [Surface host]       | [iC3bP host] * k_el_S       |
| 189 | [C3bBbC3bPC5 host] -> [Surface host] | [C3bBbC3bPC5 host] * k_el_S |

|     |                                         |                                |
|-----|-----------------------------------------|--------------------------------|
| 190 | [C3bBbC3bC5 host] -> [Surface host]     | [C3bBbC3bC5 host] * k_el_S     |
| 191 | [C3bBbC3bPC5b host] -> [Surface host]   | [C3bBbC3bPC5b host] * k_el_S   |
| 192 | [C3bBbC3bC5b host] -> [Surface host]    | [C3bBbC3bC5b host] * k_el_S    |
| 193 | [C3bBbC3bPC5bC6 host] -> [Surface host] | [C3bBbC3bPC5bC6 host] * k_el_S |
| 194 | [C3bBbC3bC5bC6 host] -> [Surface host]  | [C3bBbC3bC5bC6 host] * k_el_S  |
| 195 | [C5b7 host] -> [Surface host]           | [C5b7 host] * k_el_S           |
| 196 | [C3bCR1 host] -> [Surface host]         | [C3bCR1 host] * k_el_S         |
| 197 | [C3bH host] -> [Surface host]           | [C3bH host] * k_el_S           |
| 198 | [C3bB host] -> [Surface host]           | [C3bB host] * k_el_S           |
| 199 | [C3bBbH host] -> [Surface host]         | [C3bBbH host] * k_el_S         |
| 200 | [C3bBbCR1 host] -> [Surface host]       | [C3bBbCR1 host] * k_el_S       |
| 201 | [C3bBbDAF host] -> [Surface host]       | [C3bBbDAF host] * k_el_S       |
| 202 | [iC3bCR1 host] -> [Surface host]        | [iC3bCR1 host] * k_el_S        |
| 203 | [C3dg host] -> [Surface host]           | [C3dg host] * k_el_S           |
| 204 | [C5b8 host] -> [Surface host]           | [C5b8 host] * k_el_S           |
| 205 | [C5b9_1 host] -> [Surface host]         | [C5b9_1 host] * k_el_S         |
| 206 | [C5b9_2 host] -> [Surface host]         | [C5b9_2 host] * k_el_S         |
| 207 | [C5b9_3 host] -> [Surface host]         | [C5b9_3 host] * k_el_S         |
| 208 | [C5b9_4 host] -> [Surface host]         | [C5b9_4 host] * k_el_S         |

|     |                                     |                            |
|-----|-------------------------------------|----------------------------|
| 209 | [C5b9_5 host] -> [Surface host]     | [C5b9_5 host] * k_el_S     |
| 210 | [C5b9_6 host] -> [Surface host]     | [C5b9_6 host] * k_el_S     |
| 211 | [C5b9_7 host] -> [Surface host]     | [C5b9_7 host] * k_el_S     |
| 212 | [C5b9_8 host] -> [Surface host]     | [C5b9_8 host] * k_el_S     |
| 213 | [C5b9_9 host] -> [Surface host]     | [C5b9_9 host] * k_el_S     |
| 214 | [C5b9_10 host] -> [Surface host]    | [C5b9_10 host] * k_el_S    |
| 215 | [C5b9_11 host] -> [Surface host]    | [C5b9_11 host] * k_el_S    |
| 216 | [C5b9_12 host] -> [Surface host]    | [C5b9_12 host] * k_el_S    |
| 217 | [C5b9_13 host] -> [Surface host]    | [C5b9_13 host] * k_el_S    |
| 218 | [C5b9_14 host] -> [Surface host]    | [C5b9_14 host] * k_el_S    |
| 219 | [C5b9_15 host] -> [Surface host]    | [C5b9_15 host] * k_el_S    |
| 220 | [C5b9_16 host] -> [Surface host]    | [C5b9_16 host] * k_el_S    |
| 221 | [C5b9_17 host] -> [Surface host]    | [C5b9_17 host] * k_el_S    |
| 222 | [MAC] -> [Surface host]             | [MAC host] * k_el_S        |
| 223 | [CD59C5b9_1 host] -> [Surface host] | [CD59C5b9_1 host] * k_el_S |

---

## Reactions involving eculizumab.

| Reaction no. | Reaction                                                         | Reaction rate                                                                           |
|--------------|------------------------------------------------------------------|-----------------------------------------------------------------------------------------|
| 224          | $C5 + \text{eculizumab} \leftrightarrow [\text{eculizumab } C5]$ | $C5 * \text{eculizumab} * \text{kon\_ecu} - [\text{eculizumab } C5] * \text{koff\_ecu}$ |
| 225          | $\text{eculizumab} \rightarrow \text{null}$                      | $\text{eculizumab} * \text{k\_el\_ecu}$                                                 |
| 226          | $[\text{eculizumab } C5] \rightarrow \text{null}$                | $[\text{eculizumab } C5] * \text{k\_el\_ecu}$                                           |
