# Supplementary material for: Modeling the activation of the alternative complement pathway and its effects on hemolysis in health and disease
Source: PubMed Central journal article supplement (PMC7531836; doi:10.1371/journal.pcbi.1008139), 2020-10-02
Supplement: pcbi.1008139.s010.pdf [file pcbi.1008139.s010.pdf]

| Parameter     | Value       | Units                           | Description                                       | Source                  |
|---------------|-------------|---------------------------------|---------------------------------------------------|-------------------------|
| V             | 3.00000e+00 | L                               | Reaction volume                                   | Serum volume of a human |
| C_e           | 5.00000e+12 | cells L <sup>-1</sup>           | Concentration of erythrocytes                     | Physiological value     |
| V_e           | 9.00000e-14 | L                               | Mean corpuscular volume                           | Physiological value     |
| N_h_e         | 2.70000e+08 | cell <sup>-1</sup>              | Number of hemoglobin molecules per erythrocyte    | Physiological value     |
| MW_h          | 6.45000e+04 | Da                              | Molecular weight of hemoglobin                    | Physiological value     |
| Avogadro      | 6.02000e+23 | mol <sup>-1</sup>               | Avogadro constant                                 | Physical constant       |
| LDHmax        | 1.49500e+03 | U L <sup>-1</sup>               | Maximal LDH level                                 | S1 Figure               |
| H_LDH50       | 7.94000e+00 | g dL <sup>-1</sup>              | Hemoglobin level at half-maximal LDH levels       | S1 Figure               |
| LDH0          | 2.96000e+02 | U L <sup>-1</sup>               | Baseline LDH level                                | S1 Figure               |
| MAC50         | 1.15000e+00 | cell <sup>-1</sup>              | Number of MAC/cell resulting in 50% hemolysis     | Fig. 2, S3 Appendix     |
| k_p_C3(H2O)   | 8.30000e-07 | s <sup>-1</sup>                 | Hydrolysis of C3(H2O)                             | [1]                     |
| k_p_C3(H2O)B  | 2.13000e+05 | M <sup>-1</sup> s <sup>-1</sup> | Association of Factor B to C3(H2O)                | [2] (Estimation)        |
| k_m_C3(H2O)B  | 1.55000e-01 | s <sup>-1</sup>                 | Dissociation of complex C3(H2O)B                  | [2] (Estimation)        |
| k_p_C3bH      | 1.10000e+06 | M <sup>-1</sup> s <sup>-1</sup> | Association of Factor H to C3(H2O)                | [3]                     |
| k_m_C3bH      | 5.90000e-02 | s <sup>-1</sup>                 | Dissociation of Factor H complexes                | [3]                     |
| k_p_C3bH_surf | 1.10000e+06 | M <sup>-1</sup> s <sup>-1</sup> | Association of Factor H to surface bound proteins | [3]                     |

|                    |             |                                 |                                                    |                    |
|--------------------|-------------|---------------------------------|----------------------------------------------------|--------------------|
| k_p_C3bCR1         | 4.40000e+06 | M <sup>-1</sup> s <sup>-1</sup> | Association of CR1 to C3b                          | [3]                |
| k_m_C3bCR1         | 5.70000e-02 | s <sup>-1</sup>                 | Dissociation of CR1 complexes                      | [3]                |
| k_m_C3(H2O)Bb      | 9.00000e-03 | s <sup>-1</sup>                 | Dissociation of complex C3(H2O)Bb                  | [5]                |
| k_m_C3bBbH decay   | 7.70000e-02 | s <sup>-1</sup>                 | Decay of C3 convertase by Factor H                 | [2] (Assumption)   |
| k_p_fC3b           | 1.20000e+04 | s <sup>-1</sup>                 | Association of nfC3b and nhC3b to water            | [6]                |
| k_p_C3bB           | 2.22590e+05 | M <sup>-1</sup> s <sup>-1</sup> | Association of Factor B to C3b                     | Estimation         |
| k_m_C3bB           | 1.55000e-01 | s <sup>-1</sup>                 | Dissociation of complex C3bB                       | [7]                |
| k_m_C3bBb          | 7.70000e-03 | s <sup>-1</sup>                 | Dissociation of complex C3bBb                      | [5]                |
| k_m_C3bBbCR1 decay | 7.70000e-02 | s <sup>-1</sup>                 | Decay of C3 convertase by inhibitor CR1            | [2] (Assumption)   |
| k_p_C3bBbC3b       | 3.50000e+06 | M <sup>-1</sup> s <sup>-1</sup> | Association of C3b to C3bBb                        | [8] (Optimization) |
| k_m_C3bBbC3b       | 3.80000e-03 | s <sup>-1</sup>                 | Dissociation of complex C3bBbC3b                   | [9]                |
| k_m_C3bBbDAF decay | 2.27560e-03 | s <sup>-1</sup>                 | Decay of C3 convertase by inhibitor DAF            | Estimation         |
| k_p_C3b_surface    | 2.16000e+09 | M <sup>-1</sup> s <sup>-1</sup> | Attachment of nfC3b to erythrocyte                 | Estimation         |
| k_p_hC3b           | 2.67000e+04 | M <sup>-1</sup> s <sup>-1</sup> | Attachment of nhC3b to erythrocyte                 | [2] (Calculated)   |
| k_p_C5b7 surface   | 4.20000e+08 | M <sup>-1</sup> s <sup>-1</sup> | Attachment of C5b7 to erythrocyte                  | [2] (calculated)   |
| k_p_C3bBbDAF       | 2.52950e+10 | M <sup>-1</sup> s <sup>-1</sup> | Association of DAF to C3 convertase on erythrocyte | Estimation         |

|                   |             |                                 |                                         |                  |
|-------------------|-------------|---------------------------------|-----------------------------------------|------------------|
| k_p_iC3bCR1       | 2.00000e+03 | M <sup>-1</sup> s <sup>-1</sup> | Association of iC3b to CR1              | [2] (Estimation) |
| k_m_iC3bCR1       | 1.00000e-02 | s <sup>-1</sup>                 | Dissociation of complex iC3bCR1         | [2] (Estimation) |
| k_m_C5b           | 3.80000e-02 | s <sup>-1</sup>                 | Dissociation of complex C3bBbC3bC5b     | [10]             |
| k_p_C5b7          | 7.30000e+05 | M <sup>-1</sup> s <sup>-1</sup> | Association of C7 to C3bBbC3bC5bC6      | [8,11,12]        |
| k_m_C5b7          | 8.00000e-07 | s <sup>-1</sup>                 | Dissociation of complex C3bBbC3bC5bC6C7 | [8,11,12]        |
| k_p_C5b8          | 1.10000e+06 | M <sup>-1</sup> s <sup>-1</sup> | Association of C8 to C5b7               | [8,11,12]        |
| k_m_C5b8          | 9.80000e-07 | s <sup>-1</sup>                 | Dissociation of complex C5b8            | [8,11,12]        |
| k_p_C5b9          | 2.80000e+06 | M <sup>-1</sup> s <sup>-1</sup> | Association of C9 to C5b8               | [8,11,12]        |
| k_m_C5b9          | 1.00000e-06 | s <sup>-1</sup>                 | Dissociation of complex C5b9            | [8,11,12]        |
| k_p_CD59C5b9      | 6.03000e+11 | M <sup>-1</sup> s <sup>-1</sup> | Association of CD59 to C5b9             | Estimation       |
| k_m_CD59C5b9      | 2.00000e-04 | s <sup>-1</sup>                 | Dissociation of complex CD59C5b9        | [2] (Assumption) |
| k_p_C3bBbC3bC5bC6 | 7.74360e+04 | M <sup>-1</sup> s <sup>-1</sup> | Association of C6 to C3bBbC3bC5b        | Estimation       |
| k_m_C3bBbC3bC5bC6 | 9.00000e-08 | s <sup>-1</sup>                 | Dissociation of complex C3bBbC3bC5bC6   | [8,11]           |
| k_p_C5b7 micelle  | 6.93000e+01 | s <sup>-1</sup>                 | Formation of C5b7 micelle in fluid      | [12]             |
| k_p_CnC5b7        | 4.10000e+05 | M <sup>-1</sup> s <sup>-1</sup> | Association of Cn to C5b7               | [2] (Estimation) |
| k_m_CnC5b7        | 4.00000e-03 | s <sup>-1</sup>                 | Dissociation of complex CnC5b7          | [2] (Estimation) |

|                    |             |                                 |                                                   |                    |
|--------------------|-------------|---------------------------------|---------------------------------------------------|--------------------|
| k_p_VnC5b7         | 2.40000e+05 | M <sup>-1</sup> s <sup>-1</sup> | Association of Vn to C5b7                         | [8,13]             |
| k_m_VnC5b7         | 2.00000e-03 | s <sup>-1</sup>                 | Dissociation of complex VnC5b7                    | [2] (Assumption)   |
| k_p_VnC5b8         | 1.10000e+06 | M <sup>-1</sup> s <sup>-1</sup> | Association of C8 to VnC5b7                       | [8,11,12]          |
| k_m_VnC5b8         | 9.80000e-07 | s <sup>-1</sup>                 | Dissociation of complex VnC5b8                    | [2] (Assumption)   |
| k_p_VnC5b9         | 2.80000e+06 | M <sup>-1</sup> s <sup>-1</sup> | Association of C9 to VnC5b8                       | [2] (Assumption)   |
| k_m_VnC5b9         | 1.00000e-06 | s <sup>-1</sup>                 | Dissociation of complex VnC5b9                    | [2] (Assumption)   |
| k_p_CnC5b8         | 1.10000e+06 | M <sup>-1</sup> s <sup>-1</sup> | Association of Cn to C5b8                         | [2] (Assumption)   |
| k_m_CnC5b8         | 7.30000e+05 | s <sup>-1</sup>                 | Dissociation of complex CnC5b8                    | [2] (Assumption)   |
| k_p_CnC5b9         | 2.80000e+06 | M <sup>-1</sup> s <sup>-1</sup> | Association of C9 to CnC5b8                       | [2] (Assumption)   |
| k_m_CnC5b9         | 1.00000e-06 | s <sup>-1</sup>                 | Dissociation of complex CnC5b9                    | [2] (Assumption)   |
| k_D_cat_C3(H2O)B   | 2.10000e+00 | s <sup>-1</sup>                 | Activation of complex C3(H2O)B by enzyme Factor D | [2] (Estimation)   |
| K_D_m_C3(H2O)B     | 1.00000e-07 | M                               | Activation of complex C3(H2O)B by enzyme Factor D | [2] (Estimation)   |
| k_D_cat_C3bB       | 2.10000e+00 | s <sup>-1</sup>                 | Activation of complex C3bB by enzyme Factor D     | [8] (Optimization) |
| K_D_m_C3bB         | 1.00000e-07 | M                               | Activation of complex C3bB by enzyme Factor D     | [8] (Optimization) |
| k_C3_cat_C3(H2O)Bb | 1.80000e+00 | s <sup>-1</sup>                 | Cleavage of C3 by C3 convertase C3(H2O)Bb         | [2] (Estimation)   |
| K_C3_m_C3(H2O)Bb   | 4.19000e-06 | M                               | Cleavage of C3 by C3 convertase C3(H2O)Bb         | Estimation         |

|                   |             |                                 |                                                                  |                                    |
|-------------------|-------------|---------------------------------|------------------------------------------------------------------|------------------------------------|
| k_C3_cat_C3bBb    | 1.80000e+00 | s <sup>-1</sup>                 | Cleavage of C3 by C3 convertase C3bBb                            | [5]                                |
| K_C3_m_C3bBb      | 5.90000e-06 | M                               | Cleavage of C3 by C3 convertase C3bBb                            | [5]                                |
| k_FI_cat_C3bH     | 1.30000e+00 | s <sup>-1</sup>                 | Cleavage of C3b by inhibitor Factor I                            | [4]                                |
| K_FI_m_C3bH       | 2.50000e-07 | M                               | Cleavage of C3b by inhibitor Factor I                            | [4]                                |
| k_C5_cat_C3bBbC3b | 3.00000e-03 | s <sup>-1</sup>                 | Cleavage of C5 by C5 convertase C3bBbC3b                         | [3,14–16]                          |
| K_C5_m_C3bBbC3b   | 1.60000e-08 | M                               | Cleavage of C5 by C5 convertase C3bBbC3b                         | [3,14–16]                          |
| k_p_C3bP          | 1.23700e+08 | M <sup>-1</sup> s <sup>-1</sup> | Association of P to C3b on cell                                  | Estimation                         |
| k_m_C3bP          | 5.00000e-04 | s <sup>-1</sup>                 | Dissociation of Properdin complexes                              | [17]                               |
| k_p_C3bBP         | 2.13000e+05 | M <sup>-1</sup> s <sup>-1</sup> | Association of Factor B to C3bP                                  | [8]                                |
| k_m_C3bBbP        | 7.70000e-04 | s <sup>-1</sup>                 | Dissociation of complex C3bBbP                                   | [17]                               |
| k_p_iC3bP         | 3.00000e+06 | M <sup>-1</sup> s <sup>-1</sup> | Association of Properdin to iC3b                                 | [8] (Optimization)                 |
| k_m_iC3bP         | 3.80000e-04 | s <sup>-1</sup>                 | Dissociation of Properdin from iC3b                              | [17]                               |
| k_C3_cat_C3bBbP   | 3.10000e+00 | s <sup>-1</sup>                 | Cleavage of C3 by C3 convertase C3bBbP                           | [8] (Optimization)                 |
| K_C3_m_C3bBbP     | 1.80000e-06 | M                               | Cleavage of C3 by C3 convertase C3bBbP                           | [8] (Optimization)                 |
| k_m_C3bBbDAF      | 1.20000e-03 | s <sup>-1</sup>                 | Dissociation of DAF complexes on cell                            | [18]                               |
| k_m_C3bBbC3bP     | 5.70000e-04 | s <sup>-1</sup>                 | Decay of C3bBbC3bP on cell                                       | [17]                               |
| k_pr_surface      | 1.61000e-12 | M <sup>-1</sup> s <sup>-1</sup> | Production of erythrocytes surface due to physiological turnover | Assumption of steady-state in vivo |

|         |             |                 |                                        |                                            |
|---------|-------------|-----------------|----------------------------------------|--------------------------------------------|
| k_S     | 1.34000e-07 | s <sup>-1</sup> | Physiological turnover of erythrocytes | Physiological half-life of 60 days         |
| tau     | 1.33060e+06 | s               | Hemolysis scaling coefficient          | Derived from PNH patients                  |
| k_el_C3 | 4.61000e-06 | s <sup>-1</sup> | Elimination of C3                      | Calculated from MW (S4 Appendix, S4 Table) |
| k_el_C5 | 4.48000e-06 | s <sup>-1</sup> | Elimination of C5                      | Calculated from MW (S4 Appendix, S4 Table) |
| k_el_C6 | 9.52000e-06 | s <sup>-1</sup> | Elimination of C6                      | Calculated from MW (S4 Appendix, S4 Table) |
| k_el_C7 | 1.15000e-05 | s <sup>-1</sup> | Elimination of C7                      | Calculated from MW (S4 Appendix, S4 Table) |
| k_el_C8 | 5.88000e-06 | s <sup>-1</sup> | Elimination of C8                      | Calculated from MW (S4 Appendix, S4 Table) |
| k_el_C9 | 1.67000e-05 | s <sup>-1</sup> | Elimination of C9                      | Calculated from MW (S4 Appendix, S4 Table) |
| k_el_D  | 6.54000e-05 | s <sup>-1</sup> | Elimination of D                       | Calculated from MW (S4 Appendix, S4 Table) |
| k_el_B  | 1.13000e-05 | s <sup>-1</sup> | Elimination of B                       | Calculated from MW (S4 Appendix, S4 Table) |
| k_el_I  | 1.22000e-05 | s <sup>-1</sup> | Elimination of I                       | Calculated from MW (S4 Appendix, S4 Table) |
| k_el_P  | 2.53000e-05 | s <sup>-1</sup> | Elimination of Properdin               | Calculated from MW (S4 Appendix, S4 Table) |
| k_el_H  | 5.69000e-06 | s <sup>-1</sup> | Elimination of H                       | Calculated from MW (S4 Appendix, S4 Table) |
| k_el_Vn | 1.54000e-05 | s <sup>-1</sup> | Elimination of Vn                      | Calculated from MW (S4 Appendix, S4 Table) |
| k_el_Cn | 1.54000e-05 | s <sup>-1</sup> | Elimination of Cn                      | Calculated from MW (S4 Appendix, S4 Table) |

|           |             |                   |                     |                                            |
|-----------|-------------|-------------------|---------------------|--------------------------------------------|
| k_el_iC3b | 4.89000e-06 | s <sup>-1</sup>   | Elimination of iC3b | Calculated from MW (S4 Appendix, S4 Table) |
| k_el_Ba   | 4.65000e-05 | s <sup>-1</sup>   | Elimination of Ba   | Calculated from MW (S4 Appendix, S4 Table) |
| k_el_Bb   | 2.12000e-05 | s <sup>-1</sup>   | Elimination of Bb   | Calculated from MW (S4 Appendix, S4 Table) |
| k_el_C3a  | 1.27545e-04 | s <sup>-1</sup>   | Elimination of C3a  | [19,20]                                    |
| k_el_C5a  | 1.19766e-04 | s <sup>-1</sup>   | Elimination of C5a  | [21,22]                                    |
| k_el_C3dg | 3.81000e-05 | s <sup>-1</sup>   | Elimination of C3dg | [19,23]                                    |
| k_pr_C3   | 4.40000e-11 | M s <sup>-1</sup> | Production of C3    | Derived based on in vivo steady-state      |
| k_pr_C5   | 1.66000e-12 | M s <sup>-1</sup> | Production of C5    | Derived based on in vivo steady-state      |
| k_pr_C6   | 4.77000e-12 | M s <sup>-1</sup> | Production of C6    | Derived based on in vivo steady-state      |
| k_pr_C7   | 5.73000e-12 | M s <sup>-1</sup> | Production of C7    | Derived based on in vivo steady-state      |
| k_pr_C8   | 2.11000e-12 | M s <sup>-1</sup> | Production of C8    | Derived based on in vivo steady-state      |
| k_pr_C9   | 1.49000e-11 | M s <sup>-1</sup> | Production of C9    | Derived based on in vivo steady-state      |
| k_pr_D    | 5.33000e-12 | M s <sup>-1</sup> | Production of D     | Derived based on in vivo steady-state      |
| k_pr_B    | 9.00000e-11 | M s <sup>-1</sup> | Production of B     | Derived based on in vivo steady-state      |
| k_pr_P    | 1.19000e-11 | M s <sup>-1</sup> | Production of P     | Derived based on in vivo steady-state      |
| k_pr_I    | 4.91000e-12 | M s <sup>-1</sup> | Production of I     | Derived based on in vivo steady-state      |
| k_pr_H    | 1.83000e-11 | M s <sup>-1</sup> | Production of H     | Derived based on in vivo steady-state      |

|           |             |                                  |                           |                                       |
|-----------|-------------|----------------------------------|---------------------------|---------------------------------------|
| k_pr_Vn   | 9.24000e-11 | M s <sup>-1</sup>                | Production of Vn          | Derived based on in vivo steady-state |
| k_pr_Cn   | 6.62000e-12 | M s <sup>-1</sup>                | Production of Cn          | Derived based on in vivo steady-state |
| k_pr_CR1  | 1.11000e-15 | M s <sup>-1</sup>                | Production of CR1         | Derived based on in vivo steady-state |
| k_pr_DAF  | 3.61000e-15 | M s <sup>-1</sup>                | Production of DAF         | Derived based on in vivo steady-state |
| k_pr_CD59 | 2.81000e-14 | M s <sup>-1</sup>                | Production of CD59        | Derived based on in vivo steady-state |
| kon_ecu   | 2.31000e-04 | nM <sup>-1</sup> s <sup>-1</sup> | kon of eculizumab         | Typical mAb on-rate [24,25]           |
| koff_ecu  | 2.78000e-05 | s <sup>-1</sup>                  | koff of eculizumab        | Derived from kon and KD [26]          |
| k_el_ecu  | 5.94000e-07 | s <sup>-1</sup>                  | Elimination of eculizumab | [27]                                  |

## References

1. Pangburn MK, Schreiber RD, Müller-Eberhard HJ. Formation of the initial C3 convertase of the alternative complement pathway. Acquisition of C3b-like activities by spontaneous hydrolysis of the putative thioester in native C3. *J Exp Med.* 1981;154: 856–67.
2. Zewde N, Gorham RD, Dorado A, Morikis D. Quantitative Modeling of the Alternative Pathway of the Complement System. *PLoS One.* 2016;11: e0152337.
3. Bernet J, Mullick J, Panse Y, Parab PB, Sahu A. Kinetic analysis of the interactions between vaccinia virus complement control protein and human complement proteins C3b and C4b. *J Virol.* 2004;78: 9446–9457.
4. Pangburn MK, Müller-Eberhard HJ. Kinetic and thermodynamic analysis of the control of C3b by the complement regulatory proteins factors H and I. *Biochemistry.* 1983;22: 178–85.
5. Pangburn MK, Müller-Eberhard HJ. The C3 convertase of the alternative pathway of human complement. Enzymic properties of the bimolecular proteinase. *Biochem J.* 1986;235: 723–30.
6. Müller-Eberhard HJ, Miescher PA. *Complement.* Springer-Verlag; 1985.
7. Chen H, Ricklin D, Hammel M, Garcia BL, McWhorter WJ, Sfyroera G, et al. Allosteric inhibition of complement function by a staphylococcal immune evasion protein. *Proc Natl Acad Sci.* 2010;107: 17621 LP-17626.
8. Korotaevskiy AA, Hanin LG, Khanin MA. Non-linear dynamics of the complement system activation. *Math Biosci.* 2009;222: 127–43.
9. Muller-Eberhard HJ. The Membrane Attack Complex of Complement. *Annu Rev Immunol.* 1986;4: 503–528.



10. Cooper NR, Müller-Eberhard HJ. The reaction mechanism of human C5 in immune hemolysis. *J Exp Med.* 1970;132: 775–793.
11. Li CKN, Levine RP. Rate processes in the final stage of complement hemolysis. *Immunochemistry.* 1977;14: 421–8.
12. Podack ER, Biesecker G, Kolb WP, Müller-Eberhard HJ. The C5b-6 Complex: Reaction with C7, C8, C9. *J Immunol.* 1978;121: 484 LP-490.
13. McDonald JF, Nelsestuen GL. Potent Inhibition of Terminal Complement Assembly by Clusterin: Characterization of Its Impact on C9 Polymerization. *Biochemistry.* 1997;36: 7464–7473.
14. Rawal N, Pangburn MK. C5 convertase of the alternative pathway of complement. Kinetic analysis of the free and surface-bound forms of the enzyme. *J Biol Chem.* 1998;273: 16828–35.
15. Rawal N, Pangburn M. Formation of high-affinity C5 convertases of the alternative pathway of complement. *J Immunol.* 2001;166: 2635–42.
16. Pangburn MK, Rawal N. Structure and function of complement C5 convertase enzymes. *Biochem Soc Trans.* 2002;30: 1006–10.
17. Hourcade DE. The Role of Properdin in the Assembly of the Alternative Pathway C3 Convertases of Complement \*. *J Biol Chem.* 2006;281: 2128–2132.
18. Harris CL, Abbott RJM, Smith RA, Morgan BP, Lea SM. Molecular Dissection of Interactions between Components of the Alternative Pathway of Complement and Decay Accelerating Factor ( CD55 )\*. 2005;280: 2569–2578.
19. Nilsson B, Ekdahl KN. Complement diagnostics: concepts, indications, and practical guidelines. *Clin Dev Immunol.* 2012;2012: 962702.
20. Norda R, Schött U, Berséus O, Åkerblom O, Nilsson B, Ekdahl KN, et al. Complement activation products in liquid stored plasma and C3a kinetics after transfusion of autologous plasma. *Vox Sang.* 2012;102: 125–133.
21. Oppermann M, Götze O. Plasma clearance of the human C5a anaphylatoxin by binding to leucocyte C5a receptors. *Immunology.* 1994;82: 516.
22. Kirschfink M, Mollnes TE. Modern complement analysis. *Clin Diagn Lab Immunol.* 2003;10: 982–9.
23. Teisner B, Brandslund I, Grunnet N, Hansen LK, Thellesen J, Svehag SE. Acute complement activation during an anaphylactoid reaction to blood transfusion and the disappearance rate of C3c and C3d from the circulation. *J Clin Lab Immunol.* 1983;12: 63–67.
24. Landry JP, Ke Y, Yu G-L, Zhu XD. Measuring affinity constants of 1450 monoclonal antibodies to peptide targets with a microarray-based label-free assay platform. *J Immunol Methods.* 2015;417: 86–96.
25. Liu S, Zhang H, Dai J, Hu S, Pino I, Eichinger DJ, et al. Characterization of monoclonal antibody's binding kinetics using oblique-incidence reflectivity difference approach. *MAbs.* 2015;7: 110–9.
26. Rother RP, Rollins SA, Mojciak CF, Brodsky RA, Bell L. Discovery and development of the complement inhibitor eculizumab for the treatment of paroxysmal nocturnal hemoglobinuria. *Nat Biotechnol.* 2007;25: 1256–64.
27. Alexion Pharmaceuticals I. Soliris (eculizumab) [Package Insert]. US Food Drug Adm

website [https://www.accessdata.fda.gov/drugsatfda\\_docs/label/2019/125166s431lbl.pdf](https://www.accessdata.fda.gov/drugsatfda_docs/label/2019/125166s431lbl.pdf).  
2019; Revised June, 2019. Accessed September, 2019. LP-.
